# Supplementary material
Source: ML conference proceedings conference paper supplement (https://proceedings.neurips.cc/paper_files/paper/2015/hash/f18a6d1cde4b205199de8729a6637b42-Abstract.html)
Supplement: Supplementary file [file f18a6d1cde4b205199de8729a6637b42-Supplemental.zip]

## A Proofs for Section 2

*Proof of Proposition 2.5.* Let  $\iota \stackrel{\text{def}}{=} \pi_1 \times \cdots \times \pi_k$ . Since  $\iota$  is injective by assumption, we have

$$\exp(A(\beta; z)) = \sum_{y \in \mathcal{Y}} \exp(\beta^\top \psi(z, y)) \quad (16)$$

$$= \sum_{p \in \iota(\mathcal{Y})} \exp(\beta^\top \psi(z, \iota^{-1}(p))) \quad (17)$$

$$= \sum_{p \in \iota(\mathcal{Y})} \exp \left( - \sum_{j=1}^k \beta_j \mathbb{I}[\pi_j(f(z)) \neq p_j] \right) \quad (18)$$

$$\leq \sum_{p \in \prod_j \mathcal{Y}_j} \exp \left( - \sum_{j=1}^k \beta_j \mathbb{I}[\pi_j(f(z)) \neq p_j] \right) \quad (19)$$

$$= \prod_{j=1}^k \sum_{p_j \in \mathcal{Y}_j} \exp(-\beta_j \mathbb{I}[\pi_j(f(z)) \neq p_j]) \quad (20)$$

$$= \prod_{j=1}^k (1 + (|\mathcal{Y}_j| - 1) \exp(-\beta_j)), \quad (21)$$

as was to be shown.  $\square$

## B Proofs for Section 3

### B.1 Effect on loss

*Proof of Proposition 3.1.* Note that we have

$$L^* = \mathbb{E}_{p^*}[-\log p_{\theta^*}(y | x)] \quad (22)$$

$$= \mathbb{E}_{p^*}[-\log \mathbb{E}_{z \sim p_{\theta^*}}[\mathbb{S}(z, y)]] \quad (23)$$

$$\stackrel{(a)}{\geq} \mathbb{E}_{p^*}[-\log \mathbb{E}_{z \sim p_{\theta^*}}[\exp(\beta^\top \psi(z, y))]] \quad (24)$$

$$= \mathbb{E}_{p^*}[-\log \mathbb{E}_{z \sim p_{\theta^*}}[p_\beta(y | z) \exp(A(\beta))]] \quad (25)$$

$$= \mathbb{E}_{p^*}[-\log p_{\theta^*, \beta}(y | x) - A(\beta)] \quad (26)$$

$$= L(\theta^*, \beta) - A(\beta) \quad (27)$$

$$\stackrel{(b)}{\geq} L(\theta_\beta^*, \beta) - A(\beta). \quad (28)$$

Here (a) follows because  $\mathbb{S}(z, y) \leq \exp(\beta^\top \psi(z, y))$ , since the latter is non-negative and is 1 when  $\mathbb{S}(z, y) = 1$ ; (b) follows because  $\theta_\beta^*$  is the minimizer of  $L(\cdot, \beta)$ . Continuing:

$$L(\theta_\beta^*, \beta) - A(\beta) = \mathbb{E}_{p^*}[-\log \mathbb{E}_{z \sim p_{\theta_\beta^*}}[\exp(\beta^\top \psi(z, y))]] \quad (29)$$

$$\stackrel{(c)}{\geq} \mathbb{E}_{p^*}[-\log \mathbb{E}_{z \sim p_{\theta_\beta^*}}[\exp(-\beta_{\min}(1 - \mathbb{S}(z, y)))] \quad (30)$$

$$= \mathbb{E}_{p^*}[-\log(p_{\theta_\beta^*}(y | x) + (1 - p_{\theta_\beta^*}(y | x)) \exp(-\beta_{\min}))] \quad (31)$$

$$= \mathbb{E}_{p^*}[-\log(1 - (1 - p_{\theta_\beta^*}(y | x))(1 - \exp(-\beta_{\min})))] \quad (32)$$

$$\stackrel{(d)}{\geq} \mathbb{E}_{p^*}[(1 - p_{\theta_\beta^*}(y | x))(1 - \exp(-\beta_{\min}))]. \quad (33)$$

Again, (c) follows because  $\beta^\top \psi(z, y) \leq -\beta_{\min}(1 - \mathbb{S}(z, y))$ , and (d) follows because  $-\log(1 - x) \geq x$  for  $x \leq 1$ . Putting these together, we have  $L^* \geq (1 - \exp(-\beta_{\min})) \mathbb{E}_{p^*}[1 - p_{\theta_\beta^*}(y | x)]$ , which yields the desired result.  $\square$

*Proof of Lemma 3.2.* We will show a stronger result: any model and relaxation can be slightly modified to cause  $\mathbb{E}_{p^*}[p_{\theta^*}(y | x)]$  to be zero, in a way that is demonstrated below (though the modified model will no longer be an exponential family).

Given any  $\mathbb{S}_{1:k}$ , construct a new point  $z_0$  such that  $\mathbb{S}_{1:k}(z_0, y) = 1$  for all  $y$ , and add a new constraint  $\mathbb{S}_0(z, y) = [z \neq z_0]$ . Then  $\mathbb{S}(z_0, y) = 0$  for all  $y$ , so we never want to place mass on  $z_0$  under the unrelaxed supervision. In addition, extend the model family to allow the single additional distribution  $p'(z | x) = \mathbb{I}[z = z_0]$ .

Now, suppose  $\beta_{1:k} = \infty$  and  $\beta_0 = \beta_{\min}$ . Then, for any  $\theta$ , we have  $L(\theta, \beta) = A(\beta) + L(\theta, \infty)$ , since  $p_\theta$  places no mass on  $z_0$ ; therefore,  $L(\theta, \beta) \geq A(\beta) + L^*$  for all  $\theta$ . On the other hand, we have  $L(p', \beta) = A(\beta) + \beta_{\min}$ . If  $\beta_{\min} < L^*$ , we will thus use  $p'$  and shift all of the mass to  $z_0$ , thereby placing zero mass on the correct answer.  $\square$

Note that the proof required constructing a “bad”  $z_0$  that satisfied almost all the constraints for many values of  $y$  at once. It seems straightforward to avoid this in practice, and so it would be interesting to find assumptions under which we obtain a better relative loss bound than Proposition 3.1.

## B.2 Amount of data needed to learn

For the next few derivations we will make extensive use of the relation  $\log p_{\theta, \beta}(y | x) = A(\theta, \beta; x, y) - A(\theta; x)$ , where  $A(\theta, \beta; x, y) \stackrel{\text{def}}{=} \log(\sum_z \exp(\theta^\top \phi(x, z) + \beta^\top \psi(z, y)))$ . Note that the preceding definition is consistent with (13) since we assume throughout Section 3 that  $\mathbb{T} \equiv 1$ . We will also use the following properties of log-partition functions:

$$\nabla_\theta A(\theta, \beta; x, y) = \mathbb{E}_{z \sim p_{\theta, \beta}(\cdot | x, y)}[\phi(x, z)] \quad (34)$$

$$= \frac{\mathbb{E}_{z \sim p_\theta(\cdot | x)}[\phi(x, z) \exp(\beta^\top \psi(z, y))]}{\mathbb{E}_{z \sim p_\theta(\cdot | x)}[\exp(\beta^\top \psi(z, y))]}, \quad (35)$$

$$\nabla_\theta^2 A(\theta, \beta; x, y) = -(\nabla_\theta A)(\nabla_\theta A)^\top + \mathbb{E}_{z \sim p_{\theta, \beta}(\cdot | x, y)}[\phi(x, z) \otimes \phi(x, z)] \quad (36)$$

$$= -(\nabla_\theta A)(\nabla_\theta A)^\top + \frac{\mathbb{E}_{z \sim p_\theta(\cdot | x)}[(\phi(x, z) \otimes \phi(x, z)) \exp(\beta^\top \psi(z, y))]}{\mathbb{E}_{z \sim p_\theta(\cdot | x)}[\exp(\beta^\top \psi(z, y))]} \quad (37)$$

Here we use  $\nabla_\theta A$  as short-hand for  $\nabla_\theta A(\theta, \beta; x, y)$ . These  $\nabla_\theta A$  terms will always cancel out in the sequel, so they can be safely ignored. (The cancellation occurs because we always end up subtracting two log-normalization constants, whose gradients must be equal by first-order optimality conditions.) Analogous properties to those above hold for  $A(\theta; x)$ :

$$\nabla_\theta A(\theta; x) = \mathbb{E}_{z \sim p_\theta(\cdot | x)}[\phi(x, z)], \quad (38)$$

$$\nabla_\theta^2 A(\theta; x) = -(\nabla_\theta A)(\nabla_\theta A)^\top + \mathbb{E}_{z \sim p_\theta(\cdot | x)}[\phi(x, z) \otimes \phi(x, z)]. \quad (39)$$

In this case,  $\nabla_\theta A$  is short-hand for  $\nabla_\theta A(\theta; x)$ .

*Proof of (8).* We have

$$\mathcal{I}_\infty = \nabla_\theta^2 [-\log p_{\theta^*, \infty}(y | x)] \quad (40)$$

$$= \nabla_\theta^2 [A(\theta^*; x) - A(\theta^*, \infty; x, y)] \quad (41)$$

$$= \mathbb{E}_{\theta^*}[\phi(x, z) \otimes \phi(x, z)] - \frac{\mathbb{E}_{\theta^*}[(\phi(x, z) \otimes \phi(x, z))\mathbb{S}(z, y)]}{\mathbb{E}_{\theta^*}[\mathbb{S}(z, y)]} \quad (42)$$

$$= \mathbb{E}_{\theta^*}[\phi(x, z) \otimes \phi(x, z)] - \mathbb{E}_{\theta^*}[\phi(x, z) \otimes \phi(x, z) | \mathbb{S}] \quad (43)$$

$$= (\mathbb{P}[\neg \mathbb{S}] \mathbb{E}_{\theta^*}[\phi \otimes \phi | \neg \mathbb{S}] + \mathbb{P}[\mathbb{S}] \mathbb{E}_{\theta^*}[\phi \otimes \phi | \mathbb{S}]) - \mathbb{E}_{\theta^*}[\phi \otimes \phi | \mathbb{S}] \quad (44)$$

$$= \mathbb{P}_{\theta^*}[\neg \mathbb{S}] (\mathbb{E}_{\theta^*}[\phi \otimes \phi | \neg \mathbb{S}] - \mathbb{E}_{\theta^*}[\phi \otimes \phi | \mathbb{S}]). \quad (45)$$

The result follows by taking expectations.  $\square$

*Proof of (9).* We have

$$\mathcal{I}_\beta = \nabla_\theta^2 [-\log p_{\theta_\beta^*, \beta}(y | x)] \quad (46)$$

$$= \nabla_\theta^2 [A(\theta_\beta^*; x) - A(\theta_\beta^*, \beta; x, y)] \quad (47)$$

$$= \mathbb{E}_{\theta_\beta^*} [\phi(x, z) \otimes \phi(x, z)] - \frac{\mathbb{E}_{\theta_\beta^*} [(\phi(x, z) \otimes \phi(x, z)) \exp(\beta^\top \psi)]}{\mathbb{E}_{\theta_\beta^*} [\exp(\beta^\top \psi)]} \quad (48)$$

$$= \frac{\mathbb{E}_{\theta_\beta^*} [\phi \otimes \phi] \mathbb{E}_{\theta_\beta^*} [\exp(\beta^\top \psi)] - \mathbb{E}_{\theta_\beta^*} [(\phi \otimes \phi) \exp(\beta^\top \psi)]}{\mathbb{E}_{\theta_\beta^*} [\exp(\beta^\top \psi)]} \quad (49)$$

$$= - \frac{\text{Cov}_{\theta_\beta^*} [\phi \otimes \phi, \exp(\beta^\top \psi)]}{\mathbb{E}_{\theta_\beta^*} [\exp(\beta^\top \psi)]} \quad (50)$$

$$\stackrel{(a)}{=} - \frac{\text{Cov}_{\theta_\beta^*} [\phi \otimes \phi, 1 + \beta^\top \psi + \mathcal{O}(\beta^2)]}{\mathbb{E}_{\theta_\beta^*} [1 + \mathcal{O}(\beta)]} \quad (51)$$

$$\stackrel{(b)}{=} -\text{Cov}_{\theta_\beta^*} [\phi \otimes \phi, \beta^\top \psi] + \mathcal{O}(\beta^2), \quad (52)$$

where in (a) we used  $\exp(\beta^\top \psi) = 1 + \beta^\top \psi + \mathcal{O}(\beta^2)$  and in (b) we used  $\text{Cov}[\cdot, 1] = 0$ . The result again follows by taking expectations.  $\square$

**Note:** Assuming that  $\|\psi\|_1$  is small for most  $z$  (as measured by  $p_{\theta_\beta^*}$ ), the  $\mathcal{O}(\beta^2)$  term is small as long as  $\|\beta\|_\infty \ll 1$ . This assumption on  $\psi$  holds when  $\mathbb{P}_{\theta_\beta^*}[\mathbb{S}] \approx 1$  (so that  $\psi = 0$  most of the time).

*Proof of (10).* Recall that we are assuming  $\beta_j = \beta_{\min}$  for all  $j$ , and that the  $\neg \mathbb{S}_j$  are all disjoint. In this case,  $-\beta^\top \psi$  is equal to  $\beta_{\min}$  if a constraint is violated and 0 if no constraints are violated. We then have

$$\text{Cov}_{\theta_\beta^*} [\phi \otimes \phi, -\beta^\top \psi] \quad (53)$$

$$= \beta_{\min} \text{Cov}_{\theta_\beta^*} [\phi \otimes \phi, \mathbb{I}[\neg \mathbb{S}]] \quad (54)$$

$$= \beta_{\min} \mathbb{P}[\neg \mathbb{S}] \left( \mathbb{E}_{\theta_\beta^*} [\phi \otimes \phi | \neg \mathbb{S}] - \mathbb{E}_{\theta_\beta^*} [\phi \otimes \phi] \right) \quad (55)$$

$$= \beta_{\min} \mathbb{P}[\neg \mathbb{S}] \left( \mathbb{E}_{\theta_\beta^*} [\phi \otimes \phi | \neg \mathbb{S}] - \mathbb{P}[\neg \mathbb{S}] \mathbb{E}_{\theta_\beta^*} [\phi \otimes \phi | \neg \mathbb{S}] - \mathbb{P}[\mathbb{S}] \mathbb{E}_{\theta_\beta^*} [\phi \otimes \phi | \mathbb{S}] \right) \quad (56)$$

$$= \beta_{\min} \mathbb{P}[\mathbb{S}] \mathbb{P}[\neg \mathbb{S}] \left( \mathbb{E}_{\theta_\beta^*} [\phi \otimes \phi | \neg \mathbb{S}] - \mathbb{E}_{\theta_\beta^*} [\phi \otimes \phi | \mathbb{S}] \right), \quad (57)$$

as claimed.  $\square$

### B.3 Optimizing $\beta$

*Proof of Proposition 3.3.* We can re-express  $\mathbb{E}_{x, y \sim p^*} [-\log p(y | x)]$  as  $\text{KL}(p^* \| p) + H(p^*)$ . Hence, in particular,  $L(\theta, \beta) = \text{KL}(p^* \| p_{\theta, \beta}) + H(p^*) \geq H(p^*)$ ,<sup>2</sup> with equality if and only if  $p_{\theta, \beta} = p^*$ . On the other hand,  $p_{\theta^*, \infty} = p_{\theta^*} = p^*$  by assumption, so equality is attainable, and  $(\theta^*, \infty)$  is a global optimum of  $L$ .

Note that the normalization constant  $A(\beta)$  is important here, since if  $p_{\theta, \beta}$  did not (sub-)normalize then the KL divergence would not necessarily be non-negative.  $\square$

<sup>2</sup>Here we use the fact that  $\text{KL}(p \| q) \stackrel{\text{def}}{=} \mathbb{E}_p[\log p - \log q]$  is non-negative as long as  $p$  normalizes and  $q$  sub-normalizes, which is true for  $q = p_{\theta, \beta}$  by Proposition 2.5).

## C Proofs for Section 4

*Proof of (14).* The acceptance rate is simply the expectation, over all  $z \mid x$ , of the acceptance probability for that particular  $z$ . This can clearly be written as

$$\sum_z p_{\theta, \mathbb{T}}(z \mid x) \exp(\beta^\top \psi(z, y)) \quad (58)$$

$$= \sum_z \mathbb{T}(z, y) \exp(\theta^\top \phi(x, z) - A_{\mathbb{T}}(\theta; x, y)) \exp(\beta^\top \psi(z, y)) \quad (59)$$

$$= \exp(-A_{\mathbb{T}}(\theta; x, y)) \sum_z \mathbb{T}(z, y) \exp(\theta^\top \phi(x, z) + \beta^\top \psi(z, y)) \quad (60)$$

$$= \exp(A(\theta, \beta; x, y) - A_{\mathbb{T}}(\theta; x, y)). \quad (61)$$

Since (14) is the multiplicative inverse of (61), the result follows.  $\square$

*Proof of (15).* By convexity of  $A(\theta, \beta; x, y)$ , we have

$$A(\theta, \beta; x, y) \quad (62)$$

$$\geq A(\tilde{\theta}, \tilde{\beta}; x, y) + (\theta - \tilde{\theta})^\top \nabla_{\theta} A(\tilde{\theta}, \tilde{\beta}; x, y) + (\beta - \tilde{\beta})^\top \nabla_{\beta} A(\tilde{\theta}, \tilde{\beta}; x, y) \quad (63)$$

$$= A(\tilde{\theta}, \tilde{\beta}; x, y) + (\theta - \tilde{\theta})^\top \mathbb{E}_{p_{\tilde{\theta}, \tilde{\beta}}(\cdot \mid x, y)}[\phi(x, z)] + (\beta - \tilde{\beta})^\top \mathbb{E}_{p_{\tilde{\theta}, \tilde{\beta}}(\cdot \mid x, y)}[\psi(z, y)] \quad (64)$$

$$= A(\tilde{\theta}, \tilde{\beta}; x, y) + (\theta - \tilde{\theta})^\top \tilde{\phi} + (\beta - \tilde{\beta})^\top \tilde{\psi}, \quad (65)$$

as was to be shown.  $\square$
